# Supplementary material for: In situ confined encapsulation of ultrafine Fe2O3 nanoclusters in N/S co-doped graphene-based membranes for continuous chemical conversion
Source: Royal Society of Chemistry journal article supplement (doi:10.1039/d4ra05273k), 2024-01-01
Supplement: d4ra05273k1.pdf [file d4ra05273k1.pdf]

## Electronic Supplementary Information (ESI)

### **In-situ Confined Encapsulation of Ultrafine Fe<sub>2</sub>O<sub>3</sub> Nanoclusters in N/S Co-doped Graphene-based Membranes for Continuous Chemical Conversion**

**Yude Ke, \*,<sup>a</sup> Zixuan Fan<sup>b</sup> and Jingwen Mao<sup>a</sup>**

*<sup>a</sup> Institute of Oceanic and Environmental Chemical Engineering, State Key Lab Breeding Base of  
Green Chemical Synthesis Technology, Zhejiang University of Technology*

*Hangzhou 310014, P. R. China.*

*<sup>b</sup> Key Laboratory of Bioinorganic and Synthetic Chemistry of Ministry of Education, School of  
Chemistry, Sun Yat-Sen University*

*Guangzhou 510000, P. R. China*

*\*Corresponding author E-mail: keyude7072@163.com*

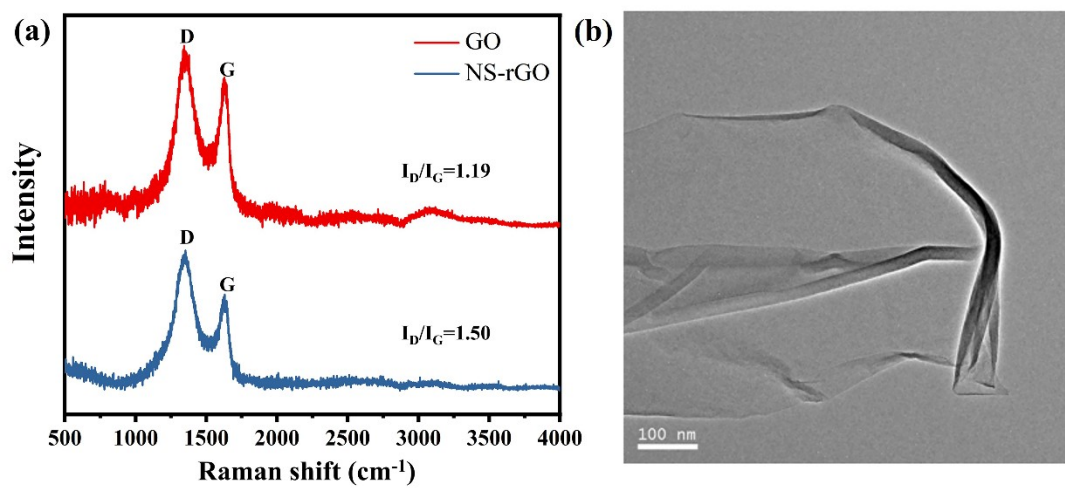

**Fig. S1.** (a) Raman spectra of GO and NS-rGO. (b) TEM image of NS-rGO.

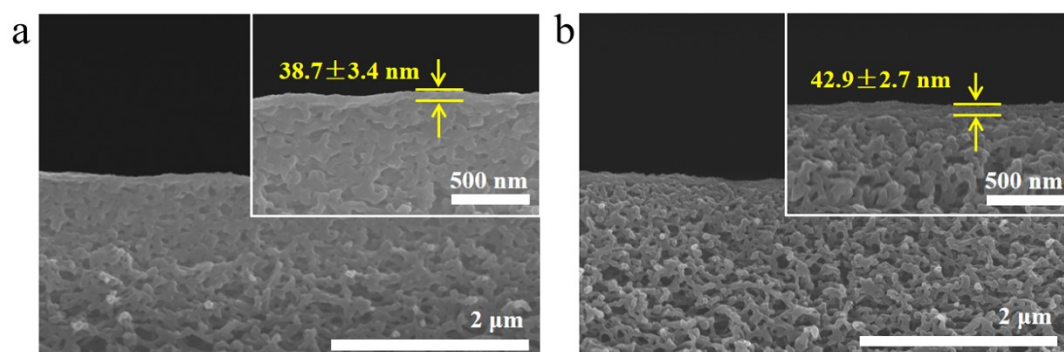

**Fig. S2.** Cross-section SEM images of Fe/NS-rGO catalytic membranes by using 0.0125M (a) and 0.05M (b) ferric chloride.

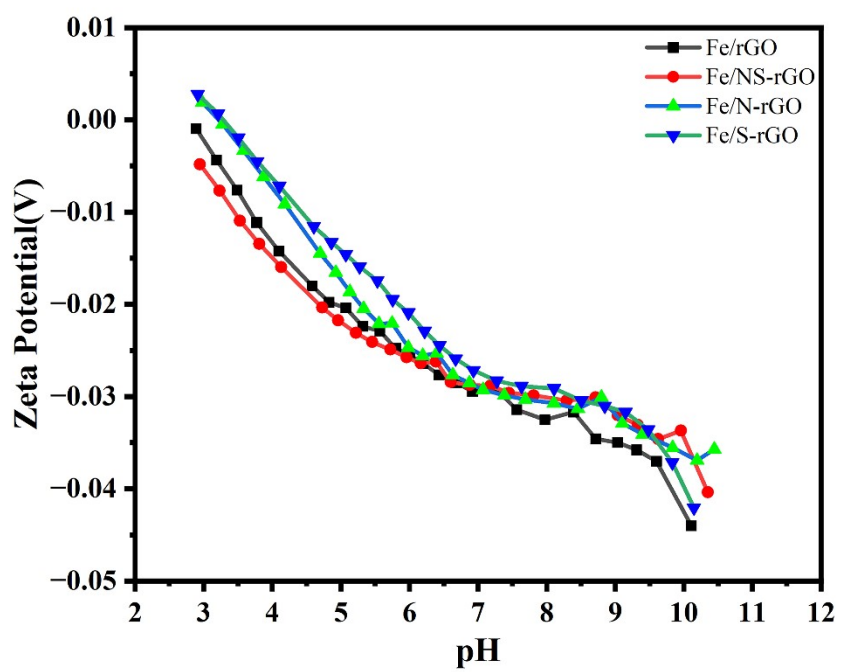

**Fig. S3.** Zeta potential of Fe/rGO, Fe/N-rGO, Fe/S-rGO, and Fe/NS-rGO samples.

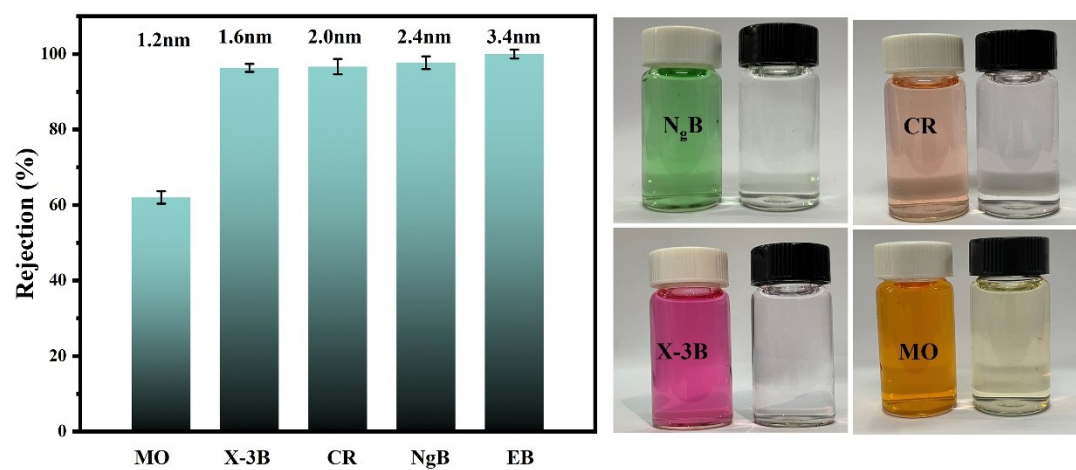

**Fig. S4.** The rejection rate of Fe/NS-rGO membranes for different dyes in cross-flow filtration and part of the comparison pictures.

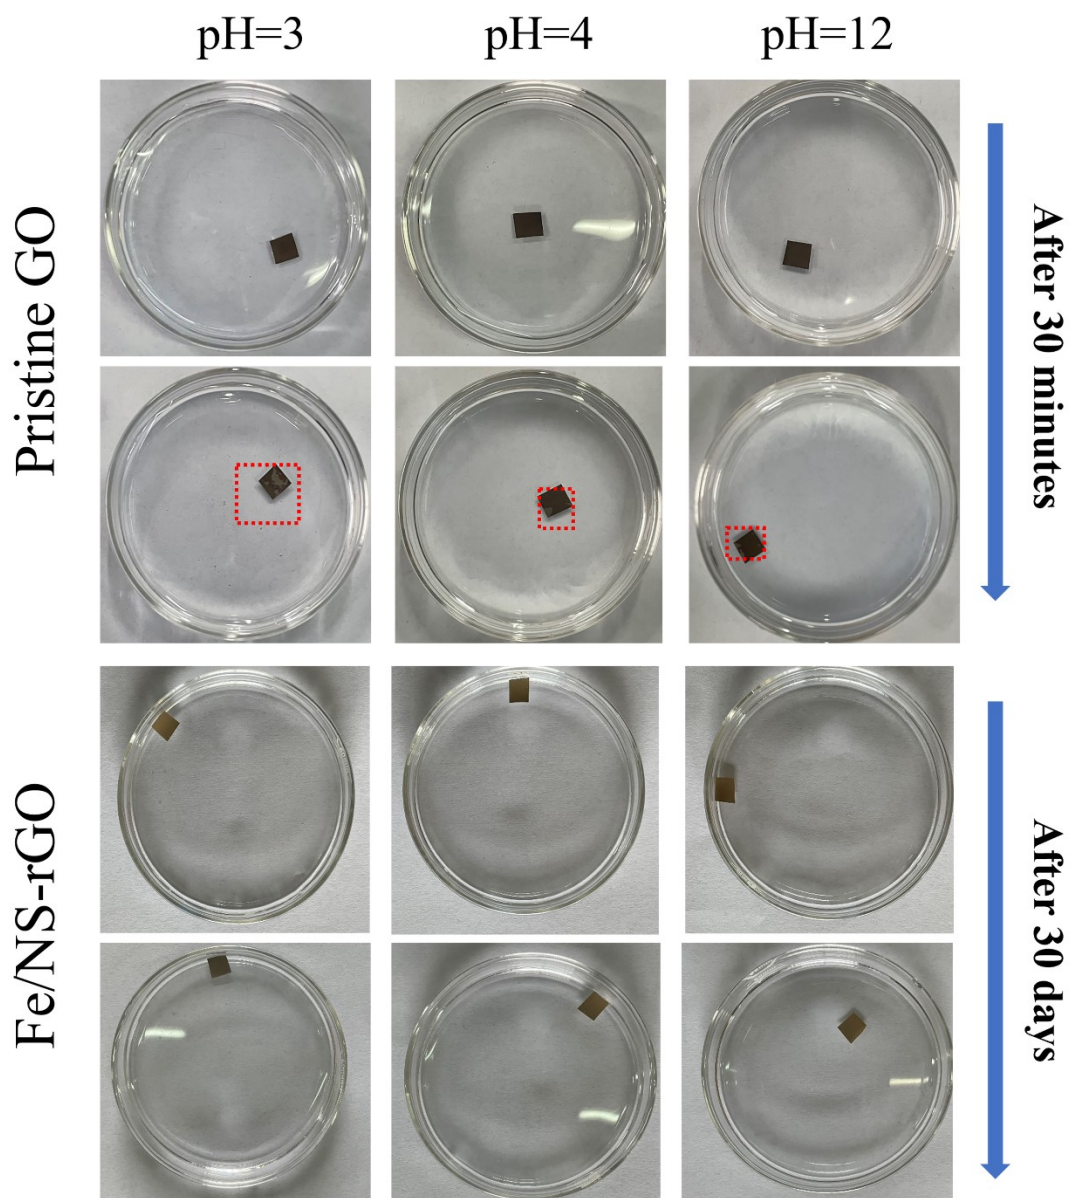

**Fig. S5.** Photographs of the GO and Fe/NS-rGO catalytic membranes before and after soaking in water at different pH for a period of time.

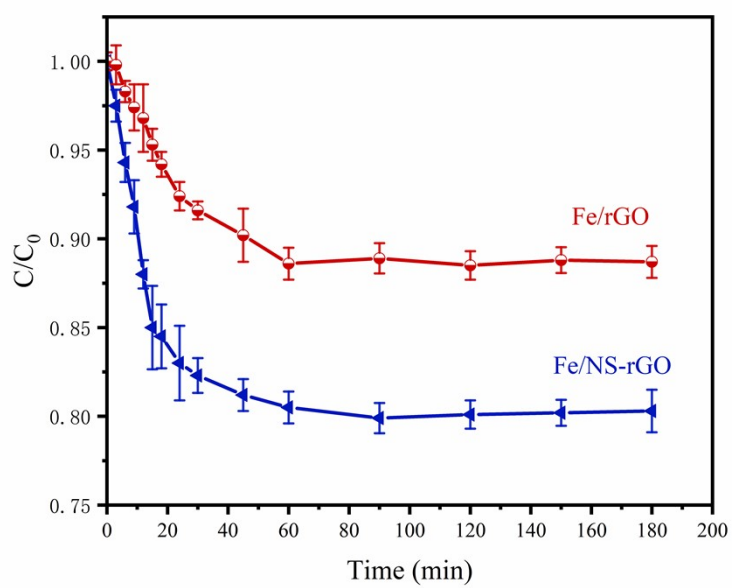

**Fig. S6.** Time-dependent adsorption of 4-NP on Fe/NS-rGO and Fe/rGO Membrane.

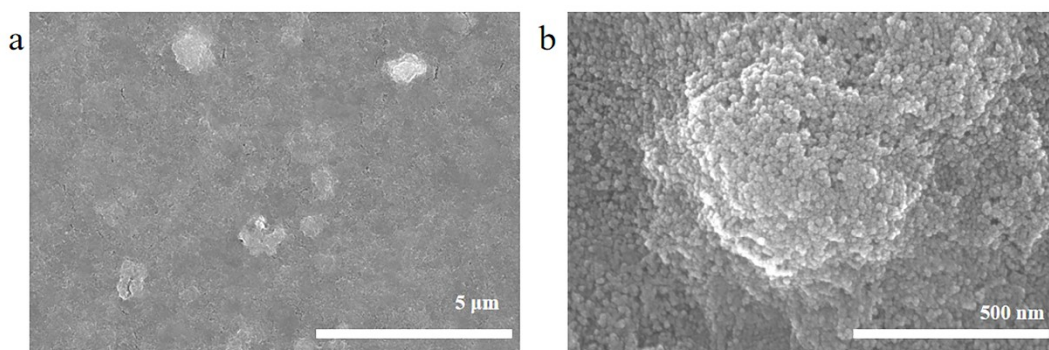

**Fig. S7.** (a, b) Surface SEM images of Fe/NS-rGO catalytic membranes by using 0.0125M and 0.05M ferric chloride.



**Table S1.** Comparison of rate constants and TOF values for the catalytic reduction of 4-NP by different membranes

| Catalyst                | Concentration of 4-NP (mM) | TOF [ $\text{h}^{-1}$ ] | k [ $\text{min}^{-1}$ ] | Ref       |
|-------------------------|----------------------------|-------------------------|-------------------------|-----------|
| Pd/PDMS/PAIHF membrane  | 1.00                       | 183.4                   | 0.024                   | 40        |
| Ni/Au-CW membrane       | 0.10                       | 25.5                    | 0.31                    | 41        |
| Cu–Ag/PES membrane      | 0.25                       | /                       | 0.0507                  | 42        |
| Ag-PES/PNM membrane     | 0.22                       | 170.9                   | 67.2                    | 43        |
| Pd-immobilized membrane | 1.20                       | 106.48                  | /                       | 44        |
| CuO/PES membrane        | 5.0                        | 115                     | /                       | 45        |
| Fe/NS-rGO membrane      | 0.30                       | 1596.0                  | 0.5657                  | This work |
| Fe/N-rGO membrane       | 0.30                       | 957.1                   | 0.2411                  | This work |
| Fe/S-rGO membrane       | 0.30                       | 1198.8                  | 0.5025                  | This work |
| Fe/rGO membrane         | 0.30                       | 12.45                   | 0.1409                  | This work |

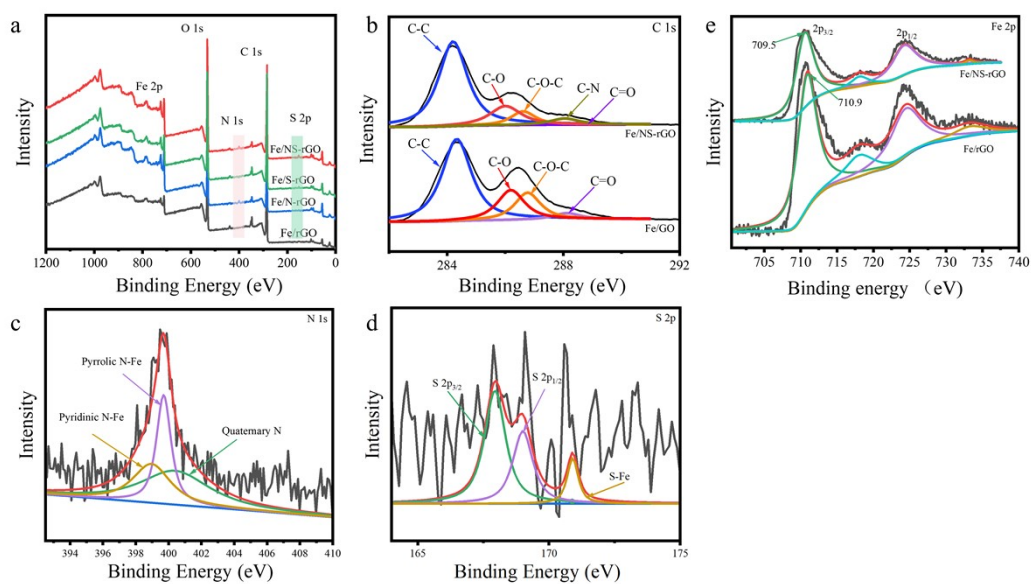

**Fig. S8.** XPS spectra. (a) Full spectra of Fe/rGO, Fe/N-rGO, Fe/S-rGO and Fe/NS-rGO samples. (b) C 1s spectra of Fe/rGO and Fe/NS-rGO composites. (c,d) N 1s and S 2p spectra of Fe/NS-rGO composites. (e) Fe 2p spectra of Fe/rGO and Fe/NS-rGO composites.
